# Supplementary material
Source: Springer Nature journal article supplement (https://www.springermedizin.de/resource/supplementary/12885_2008_1432_MOESM8_ESM.pdf/9473138)

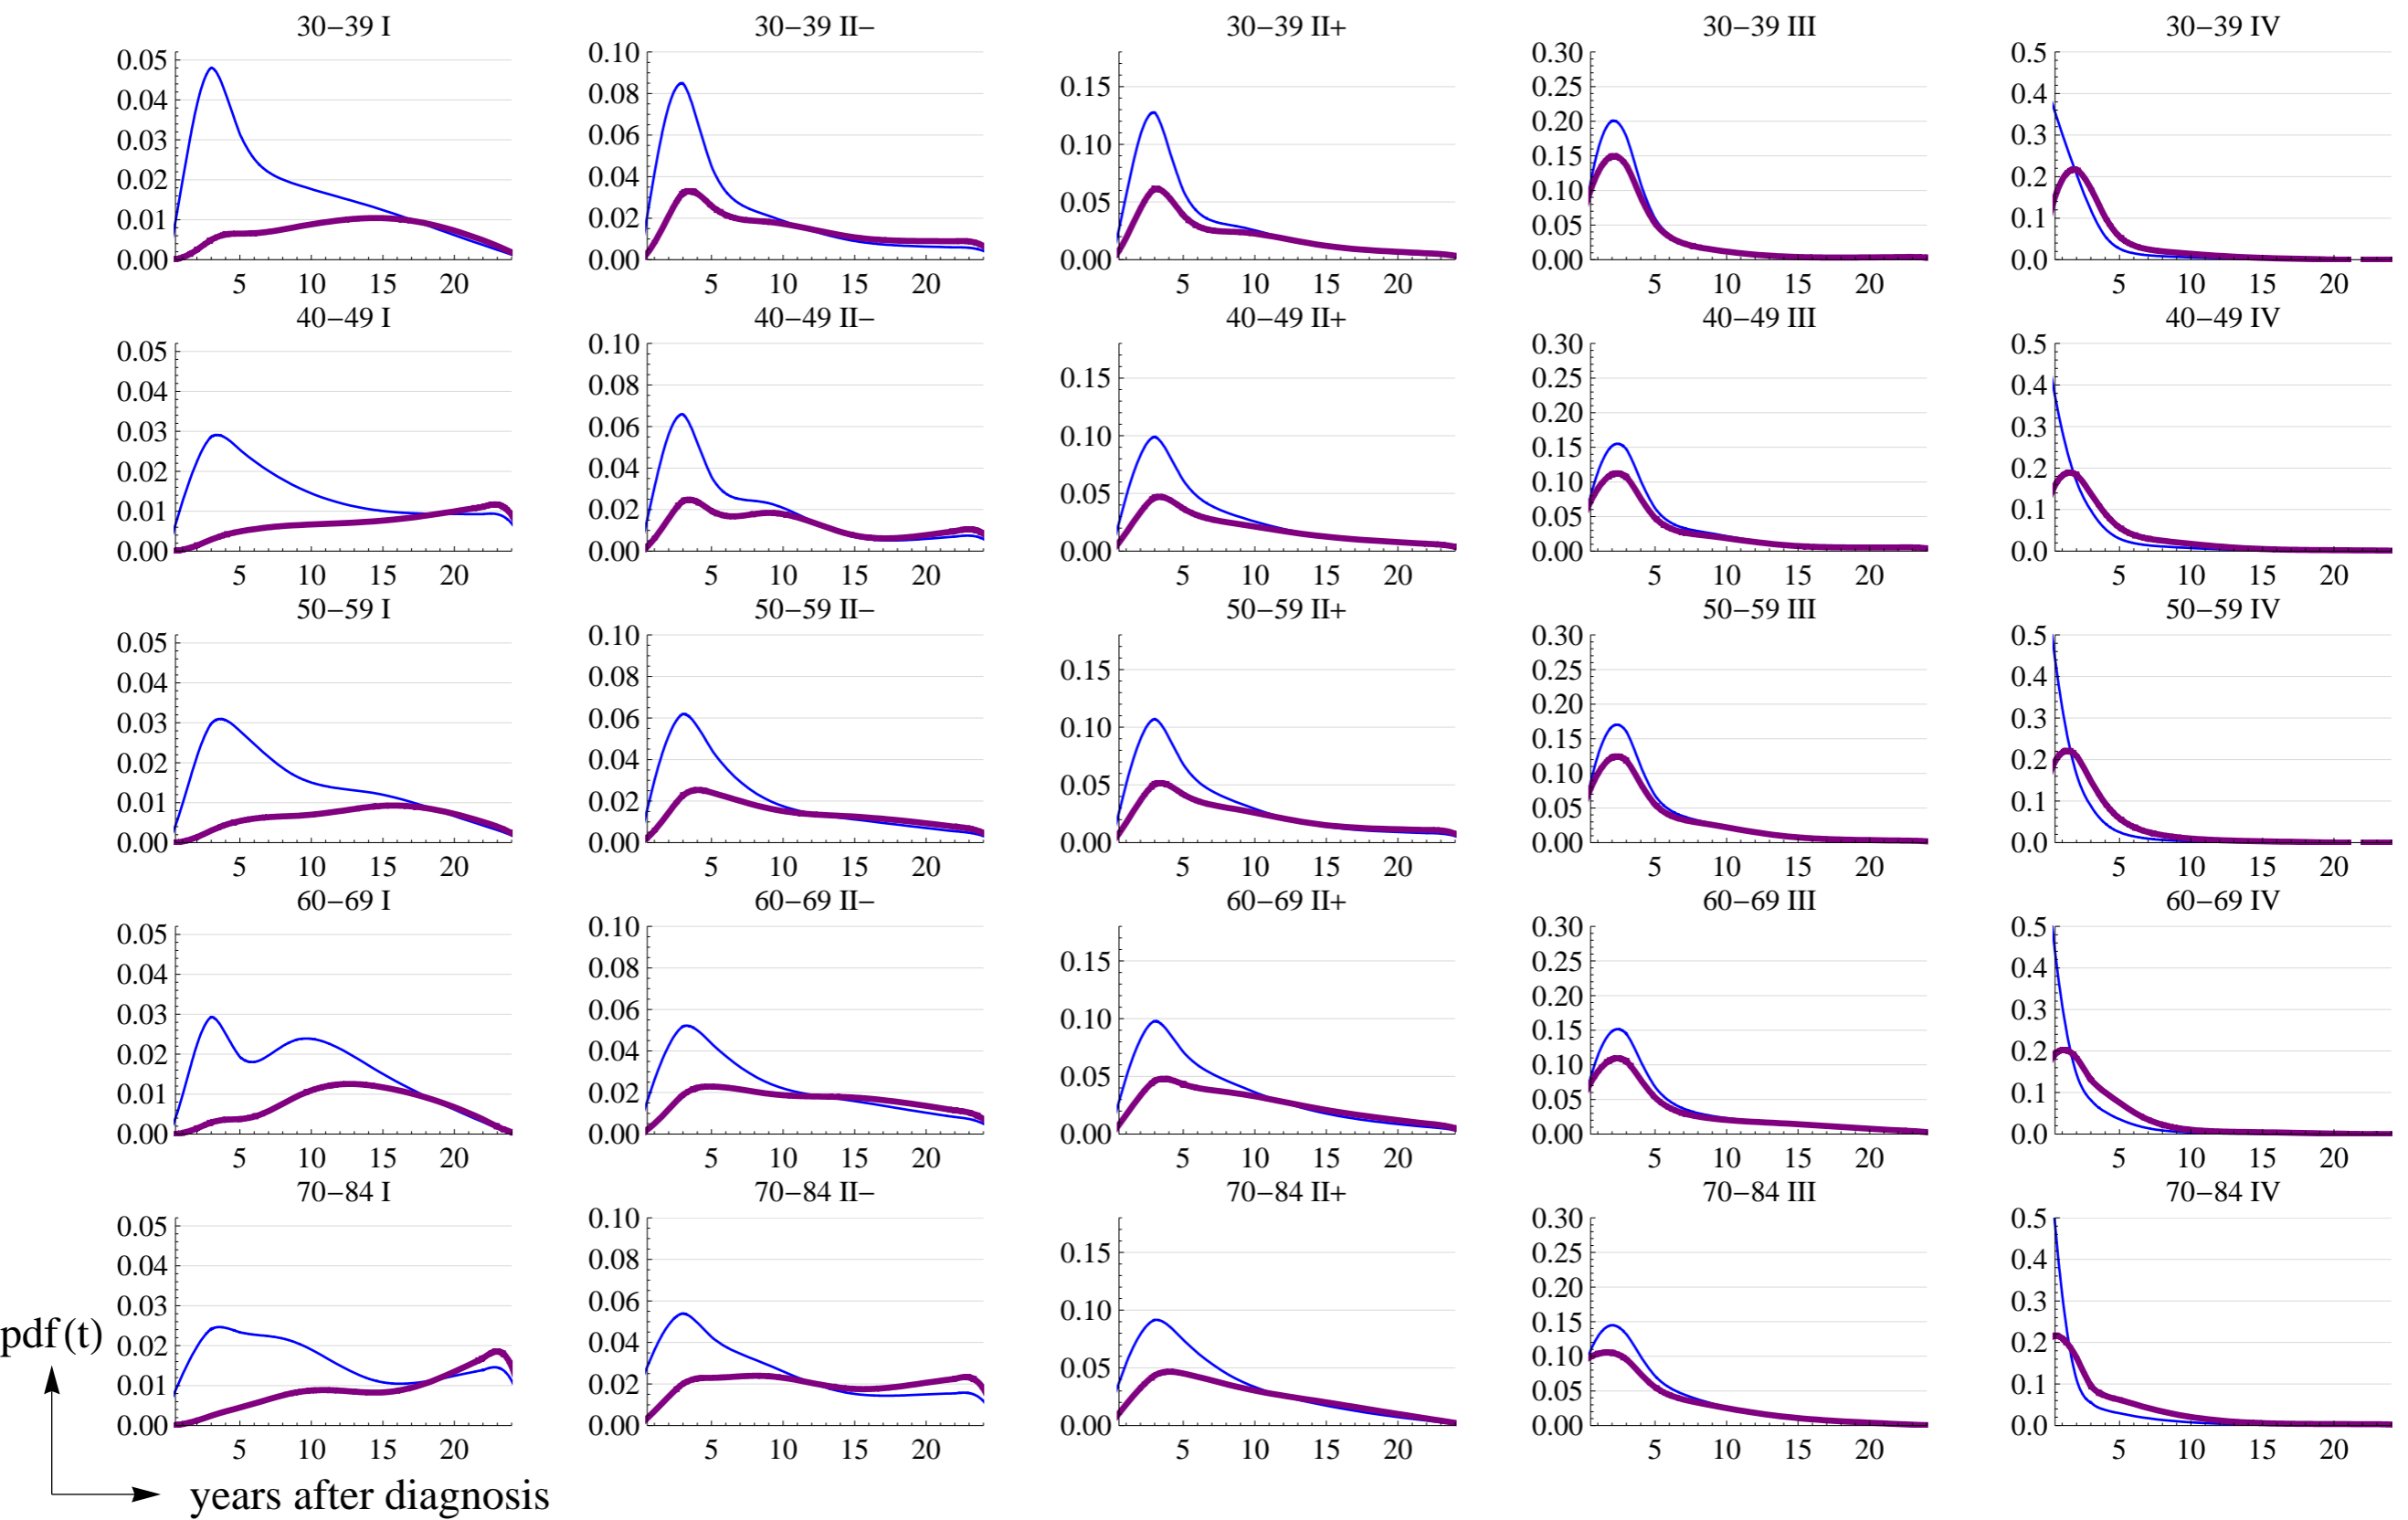

Supplement: MOESM8 [file 9473138]
